# Supplementary material
Source: Springer Nature journal article supplement (https://www.springermedizin.de/resource/supplementary/12911_2012_603_MOESM5_ESM.pdf/9526210)

All cause mortality - Females

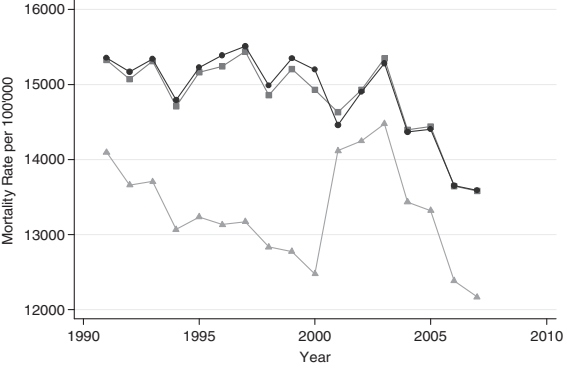

All cancer - Females

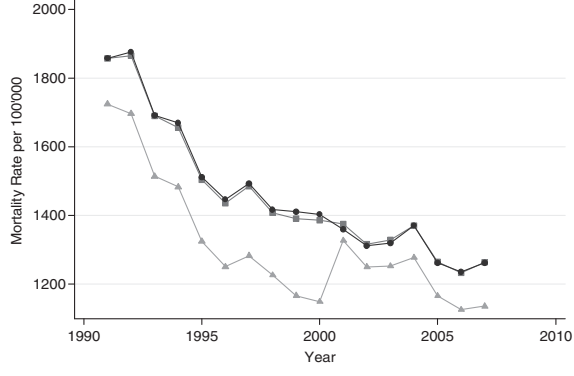

All cardiovascular - Females

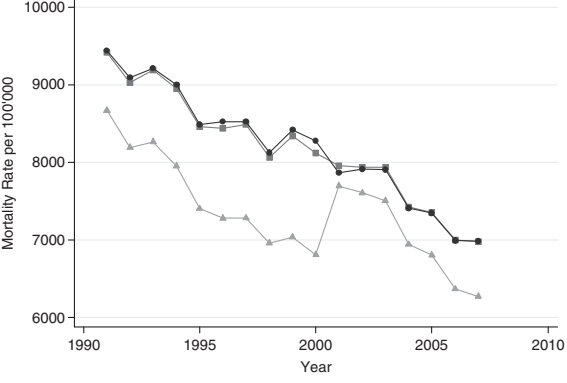

Suicide - Females

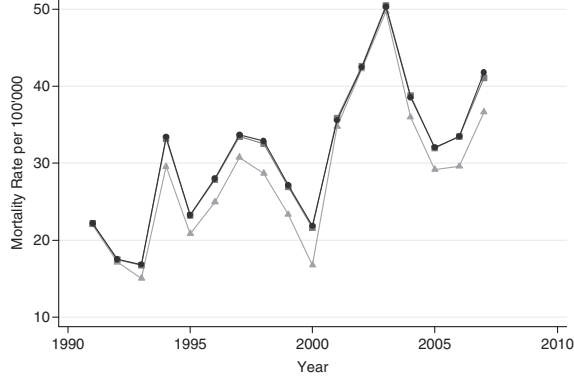

All cause mortality - Males

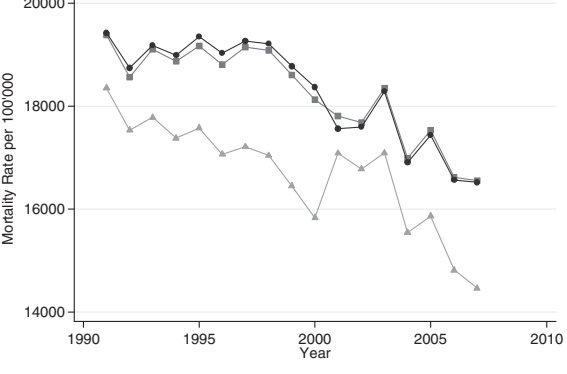

All cancer - Males

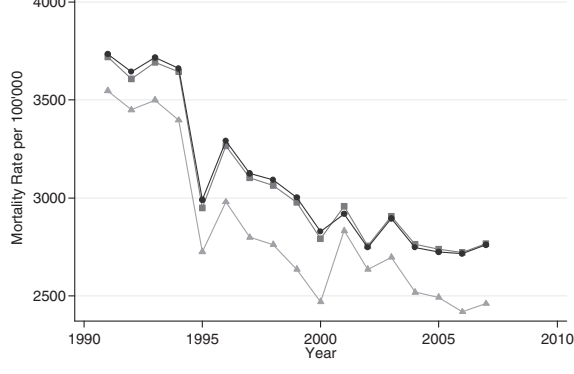

All cardiovascular - Males

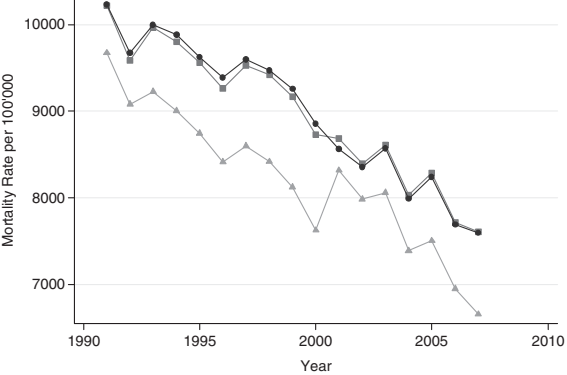

Suicide - Males

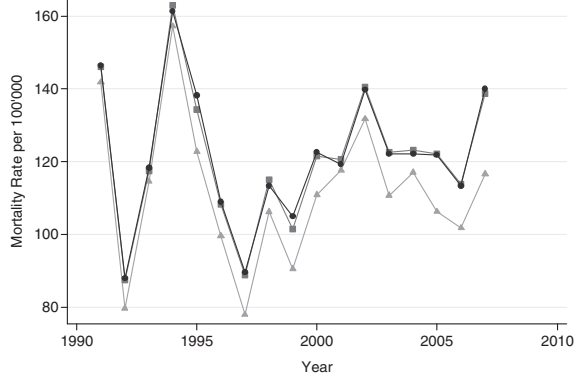

Supplement: MOESM5 [file 9526210]
